# Supplementary material for: Transposon tools: worldwide landscape of intellectual property and technological developments
Source: Springer Nature journal article supplement (doi:10.1007/s10709-009-9426-3), 2009-12-02
Supplement: MOESM2 [file 10709_2009_9426_MOESM2_ESM.doc]

**Transposon tools: worldwide landscape of intellectual property**

**and technological developments**

Fabien Palazzoli, François-Xavier Testu, Franck Merly and Yves Bigot

**Electronic Supplementary Material 2:**

**Patent documents used for the study**

**Details about the data sources and methods**

*Patent database*

We opted for the PatentScope search service rather than that of esp@cenet, because it allows one to do searches within claims, which are the most informative sections in patents, as they specify the limits of patent protection. In contrast, esp@cenet only proposes searches for keywords in titles or abstracts (ws26, Sup. Mat. 1). For example, the PatentScope result WO/2006/060314 does not contain the terms "transposase(s)" or "transposon(s)" in its title or abstract, even though a transposon is a key element in its first claim. PatentScope also offers complementary facilities, such as graphic tools representing the general term distribution of the keywords used, the citation number and the distribution of terms in the claims. However, searching in PCT applications only comes up with patent applications submitted in more than one state covered by the PCT. This implies that if there has been only a single national patent application, it will not appear. As this article focuses on the worldwide aspect of IP, we considered that a single national patent could be ignored, as such single national patents are a lot less restrictive than PCT patents.

The PatentScope website provides important information regarding the terms and conditions of use for PatentScope service (ws27, Sup. Mat. 1), particularly about availability and liability. The description and claims that are available on PatentScope Search Service are supplied in text format, and were recovered by applying automatic Optical Character Recognition procedures to the scanned images of the documents. They therefore contain some discrepancies from the originals, and have no legal value. For example, the patent search came up with no data for the *Tn10* transposon. This could suggest that the automatic Optical Character Recognition process did not correctly identify "Tn10", but anomalies such as "TnIO" or "Tn/O", as a meticulous dissection of the claims bears out. This means that PatentScope documents, and indeed the present article, engage neither the examiners nor the patent offices.

*Preliminary study*

The most recent document was PCT application WO/2008/098181 (Publication Date: 14.AUG.2008), and the oldest one was PCT application WO/1982/003087 (Publication Date: 16.SEP.1982). A screening was carried out to eliminate any documents that did not contain or involve the keywords "transposase" or "transposon" in the claims, or which excluded their use in the invention. In consequence, results were set aside, for one or more of the following reasons. First, in a few patent applications, the keywords "transposon" or "transposase" were not in fact cited in the claims, but only in the description and had been inappropriately incorporated into the claims (e.g. WO/2001/07077). Second, the use of a "transposon" or a "transposase", in the context of the invention was in fact excluded by the inventors (e.g. WO/1999/01051). Third, patent applications claiming a retrotransposon, Class-I TE (e.g. WO/2001/081598) were set aside, since in this article we are only analyzing Class-II TEs (except *Helitrons*). Fourth, if a transposon is the specific target of the invention (e.g. WO/2001/063540, WO/2001/089579), or one target among others (e.g. WO/2005/017205), as in the case of computer detection tools or chemical inhibitors. Fifth, if the invention did not directly concern a transposase or a transposon, but a gene derived from a transposon (e.g. WO/1989/005345), or a transposon site (e.g. WO/2007/022623). For many patent applications, a transposon or a transposase is one way among others to obtain mutagenesis (a gene is altered either by random mutagenesis, or site-directed mutagenesis; e.g. WO/1997/048719) or vectorizing exogenous DNA (the vector can be a plasmid, a virus, a pro-virus, a BAC, a YAC, a transposon, a bacteriophage, or a phagemid, e.g. WO/2001/073000). In general, this situation was encountered in sub-claims that depended on more general claims enumerating technical possibilities. Overall, all patents that did not claim at least one transposase or transposon as a key element of the invention were discarded.

*Patent documents used for the study*

| **NUMBER** | **PRIORITY** | **IPC** | **TITLE** |
| --- | --- | --- | --- |
| **WO/2008/098181** | 2007 | C12N 15/74 | IN VIVO GENOME-WIDE MUTAGENESIS |
| **WO/2008/082429** | 2006 | C12N 15/09 | PLANT-SPECIFIC GENETIC ELEMENTS AND TRANSFER CASSETTES FOR PLANT TRANSFORMATION |
| **WO/2008/079608** | 2006 | C12N 15/63, C12N 15/11 | COMPOSITIONS AND METHODS FOR THE EXPRESSION OF NUCLEIC ACIDS |
| **WO/2008/054945** | 2006 | C12N 9/10 | ENDURACIDIN BIOSYNTHETIC GENE CLUSTER FROM STREPTOMYCES FUNGICIDICUS |
| **WO/2008/049849** | 2006 | C12N 15/82, C12N 15/01, C12N 15/29, C12N 15/87 | MAIZE WITH GOOD DIGESTIBILITY AND DISEASE RESISTANT |
| **WO/2008/027384** | 2006 | C12N 15/06, C12N 15/09 | METHODS AND COMPOSITIONS FOR TRANSPOSON-MEDIATED TRANSGENESIS |
| **WO/2007/143681** | 2006 | A61K 48/00, C12N 15/86 | HELPER VIRUS-FREE HERPESVIRUS AMPLICON PARTICLES AND USES THEREOF |
| **WO/2007/132096** | 2006 | C12N 15/90, A61K 48/00, C12N 15/10, C12N 15/82, C12N 9/22 | SYSTEM FOR TRANSPOSING HYPERACTIVE RECOMBINANT DERIVATIVES OF MOS-1 TRANSPOSON |
| **WO/2007/109013** | 2006 | C12Q 1/68 | METHOD FOR GENETIC SELECTION OF HIGH-PLASMID PRODUCING E. COLI CLONES |
| **WO/2007/103382** | 2006 | C12N 15/82 | PLANT-SPECIFIC GENETIC ELEMENTS AND TRANSFER CASSETTES FOR PLANT TRANSFORMATION |
| **WO/2007/100821** | 2006 | A01K 67/027, C12N 15/09 | PIGGYBAC CONSTRUCTS IN VERTEBRATES |
| **WO/2007/082164** | 2006 | C12N 15/90, C12N 15/85 | METHODS FOR IDENTIFYING FUNCTIONAL NONCODING SEQUENCES |
| **WO/2007/063033** | 2005 | C12N 15/55, A61K 38/46, C12N 9/22 | PROCESS FOR THE PRODUCTION, IN PROKARYOTES, OF ACTIVE, STABLE TRANSPOSASES OF MARINER MOBILE GENETIC ELEMENTS |
| **WO/2007/041251** | 2005 | C12Q 1/68 | SYSTEM FOR DETECTING PROTEIN-PROTEIN INTERACTIONS |
| **WO/2006/135602** | 2005 | A01N 63/00 | HERPES VIRUS-BASED COMPOSITIONS AND METHODS OF USE IN THE PRENATAL AND PERINATAL PERIODS |
| **WO/2006/124001** | 2005 | C12N 15/29, C12N 15/85 | TRANSPOSITION OF MAIZE AC/DS ELEMENTS IN VERTEBRATES |
| **WO/2006/122442** | 2005 | C12N 9/22, C12N 15/09, C12N 15/85, C12N 15/86, C12N 5/16, C12N 5/22 | PIGGYBAC AS A TOOL FOR GENETIC MANIPULATION AND ANALYSIS IN VERTEBRATES |
| **WO/2006/108525** | 2005 | C12N 15/90, C12N 9/22 | RECONSTRUCTED HUMAN MARINER TRANSPOSON CAPABLE OF STABLE GENE TRANSFER INTO CHROMOSOMES IN VERTEBRATES |
| **WO/2006/089121** | 2005 | A61K 39/09, A61K 39/02 | STREPTOCOCCUS INIAE PHOSPHOGLUCOMUTASE IS A VIRULENCE FACTOR AND TARGET FOR VACCINE DEVELOPMENT |
| **WO/2006/077411** | 2005 | C12N 15/10, C12Q 1/68 | POLYPEPTIDE MUTAGENESIS METHOD |
| **WO/2006/060314** | 2004 | C12N 15/861, C12N 15/86, C12N 7/00 | GENERATION OF REPLICATION COMPETENT VIRUSES FOR THERAPEUTIC USE |
| **WO/2006/055040** | 2004 | G01N 33/68, C12N 15/09, C12N 15/90 | IDENTIFICATION OF PROTEINS IN A GENOME |
| **WO/2006/046152** | 2004 | C12N 15/63, C12N 1/21 | METHODS FOR HETEROLOGOUS EXPRESSION OF SECONDARY METABOLITES |
| **WO/2006/035045** | 2004 | A01H 5/10, C12N 15/82 | MAIZE HAVING AN IMPROVED DIGESTIBILITY |
| **WO/2006/029449** | 2004 | C12N 1/21, C12N 15/12 | CHROMOSOMAL INSERTION OF GFP INTO BACTERIA FOR QUALITY CONTROL |
| **WO/2006/029076** | 2004 | C12N 15/82, A01H 1/00 | PLANT-SPECIFIC GENETIC ELEMENTS AND TRANSFER CASSETTES FOR PLANT TRANSFORMATION |
| **WO/2006/017371** | 2004 | C12N 15/10 | METHODS OF PRODUCING MUTANT POLYNUCLEOTIDES |
| **WO/2006/008468** | 2004 | C12N 15/861, C12N 15/10, C12N 15/64 | ADENOVIRUS VECTOR AND METHOD TO MANIPULATE THE ADENOVIRUS GENOME |
| **WO/2005/111060** | 2004 | C12N 5/10, C07K 14/47, C12N 15/12 | MOLECULES INVOLVED IN PROTEIN FOLDING AND METHODS OP IDENTIFYING THEM |
| **WO/2005/100585** | 2004 | C12P 21/00, C12P 19/34, C12P 21/06 | METHODS FOR OBTAINING DIRECTIONALLY TRUNCATED POLYPEPTIDES |
| **WO/2005/087263** | 2004 | A61K 39/245 | VACCINE FOR PREVENTING AND/OR TREATING A HERPES VIRUS INFECTION |
| **WO/2005/083092** | 2004 | C12N 15/80, C12N 9/22 | TRANSPOSON FROM ASPERGILLUS FUMATIGUS AND MUTAGENESIS THEREWITH |
| **WO/2005/066344** | 2004 | C07K 14/61, C12N 15/62, C12N 15/70, C12N 15/10 | NEW PLASMIDS, THEIR DERIVATIVES AND FRAGMENTS, THEIR METHODS OF MANUFACTURE AND APPLICATION |
| **WO/2005/062923** | 2003 | C12P 23/00, C07H 21/04, C12N 1/21, C12N 9/10 | GENE TARGETS FOR ENHANCED CAROTENOID PRODUCTION |
| **WO/2005/062881** | 2003 | A01K 67/00, A01K 67/027 | GENE THERAPY USING TRANSPOSON-BASED VECTORS |
| **WO/2005/049789** | 2003 | C12N 15/63, C07H 21/02, C07H 21/04, C12N 15/00, C12N 15/09, C12N 15/85, C12N 5/00 | SYNTHETIC MAMMALIAN RETROTRANSPOSON GENE |
| **WO/2005/024062** | 2003 | C12N 15/10, C12Q 1/68 | METHOD FOR THE IDENTIFICATION OF ATTENUATING LESIONS IN PATHOGENS |
| **WO/2005/017205** | 2003 | C12Q 1/68 | NUCLEIC ACID MAPPING USING LINEAR ANALYSIS |
| **WO/2005/016504** | 2003 | C12N 15/00, C07H 21/00, C12N 15/10, C12N 15/63 | DISRUPTION OF ACC SYNTHASE GENES TO DELAY SENESCENCE IN PLANTS |
| **WO/2005/003364** | 2003 | C12N 15/68, C12N 15/79, C12N 15/90 | STABLE INTEGRANDS |
| **WO/2004/106360** | 2003 | C12P 19/34, C07H 21/02, C07K 1/00, C12N 7/00 | VIRAL VECTORS WITH IMPROVED PROPERTIES |
| **WO/2004/093645** | 2003 | C12N 15/87 | TN5 TRANSPOSASE MUTANTS AND THE USE THEREOF |
| **WO/2004/090146** | 2003 | C12N 15/10, C12N 15/90, C12N 9/22 | DELIVERY OF NUCLEIC ACIDS INTO EUKARYOTIC GENOMES USING IN VITRO ASSEMBLED MU TRANSPOSITION COMPLEXES |
| **WO/2004/078981** | 2003 | C12N 9/22, A61K 38/00 | HYPERACTIVE, NON-PHOSPHORYLATED, MUTANT TRANSPOSASES OF MARINER MOBILE GENETIC ELEMENTS |
| **WO/2004/078962** | 2003 | A61K 31/7052, C12N 9/22 | MOBILE GENETIC ELEMENTS BELONGING TO THE MARINER FAMILY IN HYDROTHERMAL EUKARYOTES |
| **WO/2004/070042** | 2003 | C12N 15/90 | TRANSPOSON-BASED TARGETING SYSTEM |
| **WO/2004/069995** | 2003 | C12N 15/90 | TRANSPOSON-BASED TARGETING SYSTEM |
| **WO/2004/069994** | 2003 | C12N 15/90 | TRANSPOSON-BASED TARGETING SYSTEM |
| **WO/2004/067743** | 2003 | C07K 14/62, C07K 16/00, C07K 16/02, C07K 16/10, C07K 16/26, C12N 15/85, A61K 39/00 | VACCINE PRODUCTION USING TRANSPOSON BASED VECTORS |
| **WO/2004/067707** | 2003 | C07K 14/62, C07K 16/00, C07K 16/02, C07K 16/10, C07K 16/26, C12N 15/85, A61K 39/00 | ADMINISTRATION OF TRANSPOSON-BASED VECTORS TO REPRODUCTIVE ORGANS |
| **WO/2004/065581** | 2003 | C12N 15/85 | TRANSPOSON-INSULATOR ELEMENT DELIVERY SYSTEMS |
| **WO/2004/044150** | 2002 | A01K 67/00, A01K 67/033, C12N 15/90, C12N 5/06, C12N 5/10 | SYSTEMS FOR GENE TARGETING AND PRODUCING STABLE GENOMIC TRANSGEN E INSERTIONS |
| **WO/2004/018624** | 2002 | C07K 14/31, C12N 15/10, A61K 38/00 | RANDOM TRANSPOSON INSERTION IN STAPHYLOCOCCUS AUREUS AND USE THEREOF TO IDENTIFY ESSENTIAL GENES |
| **WO/2004/015088** | 2002 | C12N 15/74, C12N 9/22, C12P 19/62 | TRANSPOSON-BASED TRANSFORMATION SYSTEM |
| **WO/2004/013171** | 2002 | A01K 67/033, C07K 16/00, C07K 16/18, C07K 16/42 | MULTI-SUBUNIT PROTEIN PRODUCTION SYSTEM IN TRANSGENIC INSECT |
| **WO/2004/006855** | 2002 | A61K 39/05, C12N 1/36 | RHODOCOCCUS EQUI MUTANTS AND VACCINES COMPRISING SAME |
| **WO/2004/003157** | 2002 | C07K 14/62, C07K 16/00, C07K 16/02, C07K 16/10, C07K 16/26, C12N 15/85, A61K 39/00, A61K 48/00 | GENE REGULATION IN TRANSGENIC ANIMALS USING A TRANSPOSON-BASED VECTOR |
| **WO/2003/100070** | 2002 | C12N 15/85, C12N 15/90 | THE FROG PRINCE, A TRANSPOSON VECTOR FOR GENE TRANSFER IN VERTEBRATES |
| **WO/2003/097826** | 2002 | A01K 67/027, A01K 67/033, C12N 15/10, C12N 15/85, C12N 15/90, C12N 9/22 | USE OF MINOS IN FUNCTIONAL GENOMICS |
| **WO/2003/097813** | 2002 | C07K 14/31 | REGULATION OF STAPHYLOCOCCUS AUREUS BIOFILM FORMATION |
| **WO/2003/093451** | 2002 | C07H 21/04 | TRANSPOSABLE ELEMENTS IN RICE AND METHODS OF USE |
| **WO/2003/093428** | 2002 | C12N 15/82, C12N 15/90, C12N 9/00, C12N 9/12 | GENE TARGETING USING REPLICATING DNA MOLECULES |
| **WO/2003/089639** | 2002 | C12N 15/10, C12N 15/90 | TRANSPOSON FOR BIDIRECTIONAL INTRAMOLECULAR GENOME DELETIONS, CONSTRUCTION OF NOVEL MICROORGANISM AND IDENTIFICATION OF NONESSENTIAL GENES USING THE SAME |
| **WO/2003/089618** | 2002 | C12N 15/90, C12N 9/22, A61K 48/00 | TRANSPOSON SYSTEM AND METHODS OF USE |
| **WO/2003/089572** | 2002 | C07K 14/21, G06F 19/00, A61K 38/00 | ESSENTIAL AND IMPORTANT GENES OF PSEUDOMONAS AEROGINOSA AND THE USE THEREOF TO DESIGN OR IDENTIFY ANTIBACTERIAL AGENTS |
| **WO/2003/087370** | 2002 | C12N 15/10, C12N 15/90 | METHOD AND MATERIALS FOR PRODUCING DELETION DERIVATIVES OF POLYPEPTIDES |
| **WO/2003/076464** | 2002 | C07K 14/38, A61K 38/00 | MUTAGENESIS OF ASPERGILLUS FUNGI AND IDENTIFICATION OF GENES ESSENTIAL FOR GROWTH |
| **WO/2003/074700** | 2002 | C12N 15/10, C12N 15/90 | TRANSPOSON |
| **WO/2003/070955** | 2002 | C12N 15/63, C12N 15/90 | CONSTRUCTION OF NOVEL STRAINS CONTAINING MINIMIZING GENOME BY Tn5-COUPLED Cre/loxp EXCISION SYSTEM |
| **WO/2003/062390** | 2002 | G01N 33/50 | COMPOSITIONS AND METHODS FOR THE MODULATION OF SPHINGOLIPID METABOLISM AND/OR SIGNALING |
| **WO/2003/060120** | 2001 | C07K 14/22, C12N 15/10, C12Q 1/68 | MEANS FOR IDENTIFYING NEISSEIRIA MENENGITIDIS SPECIFIC GENES |
| **WO/2003/056912** | 2002 | A01K 67/027, A01K 67/033, C12N 15/85, C12N 15/90, C12N 9/22 | INDUCIBLE TRANSPOSITION IN TRANSGENIC ORGANISM USING TRANSPOSON VECTOR |
| **WO/2003/031629** | 2001 | C12N 15/63 | METHODS OF PREPARING A TARGETING VECTOR AND USES THEREOF |
| **WO/2003/027241** | 2001 | C12N 15/85, C12N 15/90 | ANIMAL INTEGRATION VECTOR AND METHODS FOR ITS USE |
| **WO/2003/002738** | 2001 | C12N 15/10, C12N 15/76 | METHODS AND MATERIALS FOR GENERATING GENETIC DISRUPTIONS IN BACTERIAL CELLS |
| **WO/2002/103513** | 2001 | C07K 14/21, A61K 38/00 | ESSENTIAL AND IMPORTANT GENES OF PSEUDOMONAS AERUGINOSA AND THE USE THEREOF TO DESIGN OR IDENTIFY ANTIBACTERIAL AGENTS |
| **WO/2002/101061** | 2001 | C12N 15/82 | METHOD FOR OBTAINING A MONOCOTYLEDON PLANT CONTAINING A GENE OF INTEREST FREE OF FOREIGN ANCILLARY SEQUENCE |
| **WO/2002/097100** | 2001 | C12N 15/70 | CLONING VECTORS FOR HOMOLOGOUS RECOMBINATION AND METHOD USING SAME |
| **WO/2002/084280** | 2001 | A01K 67/033 | INSECT AMMUNITION VECTORS AND METHODS OF USE TO IDENTIFY PESTICIDE TARGETS |
| **WO/2002/070666** | 2001 | C07K 14/31, C12Q 1/14, C12Q 1/18 | COMPOSITIONS AND METHODS FOR REGULATING AUTOLYTIC PROCESSES IN BACTERIA |
| **WO/2002/068634** | 2001 | C12N 15/10 | METHOD FOR PRODUCING GENE LIBRARIES |
| **WO/2002/068631** | 2001 | C12N 15/74 | PLASMID FOR INSERTIONAL MUTAGENESIS IN BACTERIA |
| **WO/2002/066653** | 2000 | C12N 15/10 | PROCARYOTIC LIBRARIES AND USES |
| **WO/2002/062991** | 2001 | C12N 15/10, C12N 15/90 | INSERTIONAL MUTAGENESIS TECHNIQUE |
| **WO/2002/053732** | 2000 | C12N 15/85, C12N 15/90 | METHODS FOR MAKING POLYNUCLEOTIDE LIBRARIES, POLYNUCLEOTIDE ARRAYS, AND CELL LIBRRARIES FOR HIGH-THROUGHPUT GENOMICS ANALYSIS |
| **WO/2002/046444** | 2000 | C12N 15/90, C12N 9/22 | DOUBLE TRANSPOSITION METHODS FOR MANIPULATING NUCLEIC ACIDS |
| **WO/2002/024890** | 2000 | C07K 14/415, C12N 15/82 | RICE MLH1 ORTHOLOG AND USES THEREOF |
| **WO/2002/022876** | 2000 | C07K 14/24, C07K 14/245, C07K 14/255, C12N 15/10, C12Q 1/68 | METHOD OF IDENTIFYING PUTATIVE ANTIBIOTIC RESISTANCE GENES |
| **WO/2002/022804** | 2000 | C12N 15/82, C12N 15/90 | COMPOSITIONS AND METHODS FOR STABLE TRANSFORMATION USING MU BACTERIOPHAGE CLEAVED DONOR COMPLEX |
| **WO/2002/018601** | 2000 | C07K 14/285 | ESSENTIAL BACTERIA GENES AND GENOME SCANNING IN HAEMOPHILUS INFLUENZAE FOR THE IDENTIFICATION OF 'ESSENTIAL GENES' |
| **WO/2002/008431** | 2000 | C12N 15/10, C12N 15/74 | COMPOSITIONS AND METHODS FOR USE THEREOF IN MODIFYING THE GENOMES OF MICROORGANISMS |
| **WO/2002/008286** | 2000 | C07K 14/47, C12N 15/82 | ZINC FINGER DOMAIN RECOGNITION CODE AND USES THEREOF |
| **WO/2002/004674** | 2000 | C12N 15/09, C12N 15/10, C12Q 1/68 | TRANSPOSON MEDIATED MULTIPLEX SEQUENCING |
| **WO/2002/004629** | 2000 | C12N 15/10, C12N 15/90, C12N 9/22 | MOLECULAR BREEDING OF TRANSPOSABLE ELEMENTS |
| **WO/2002/000916** | 2000 | C12N 15/10 | METHODS FOR IDENTIFYING AN ESSENTIAL GENE IN A PROKARYOTIC MICROORGANISM |
| **WO/2001/089579** | 2000 | A61K 47/48 | COMPOSITION FOR DELIVERY OF COMPOUNDS TO CELLS |
| **WO/2001/085965** | 2000 | C12N 15/10, C12N 15/70 | VECTORS FOR USE IN TRANSPOSON-BASED DNA SEQUENCING METHODS |
| **WO/2001/083786** | 2000 | C12N 15/74, C12N 15/90, C12N 9/10, C12N 9/12, C12N 9/92, C12P 7/06 | STABLE ZYMOMONAS MOBILIS XYLOSE AND ARABINOSE FERMENTING STRAINS |
| **WO/2001/081565** | 2000 | C12N 15/90 | SLEEPING BEAUTY, A TRANSPOSON VECTOR WITH A BROAD HOST RANGE FOR THE GENETIC TRANSFORMATION IN VERTEBRATES |
| **WO/2001/079419** | 2000 | C12Q 1/68 | CELLULAR ARRAYS FOR THE IDENTIFICATION OF ALTERED GENE EXPRESSION |
| **WO/2001/077319** | 2000 | C07K 14/33, C12N 15/65, C12N 15/74 | GENETIC MANIPULATION OF CLOSTRIDIUM DIFFICILE |
| **WO/2001/071040** | 2000 | C12N 15/10, C12Q 1/68 | METHOD FOR DETERMINATION OF GENE FUNCTION |
| **WO/2001/071019** | 2000 | A01K 67/033, C12N 15/82, C12N 15/85, C12N 15/90 | METHOD OF GENERATING TRANSGENIC ORGANISMS USING TRANSPOSONS |
| **WO/2001/064926** | 2000 | C12N 15/82 | METHODS AND COMPOSITIONS TO REDUCE OR ELIMINATE TRANSMISSION OF A TRANSGENE |
| **WO/2001/051649** | 2000 | C12Q 1/18 | IDENTIFICATION OF VIRULENCE DETERMINANTS |
| **WO/2001/044483** | 1999 | A01K 67/033, C12N 15/85 | TRANSGENIC INSECT |
| **WO/2001/034819** | 1999 | C07K 14/415, C12N 15/82 | GENES AND METHODS FOR MANIPULATION OF GROWTH |
| **WO/2001/030965** | 1999 | A61K 38/00, A61K 48/00, C12N 15/00, C12N 15/63, C12N 15/85, C12N 15/87 | METHODS OF IN VIVO GENE TRANSFER USING A SLEEPING BEAUTY TRANSPOSON SYSTEM |
| **WO/2001/029205** | 1999 | A01K 67/033, C12N 15/90, C12N 9/22 | METHOD FOR GENETIC MANIPULATION |
| **WO/2001/021781** | 1999 | C12N 15/82 | METHODS FOR SITE-ASSOCIATED MODIFICATION OF GENE ACTIVITY AND NUCLEIC ACID STRUCTURE |
| **WO/2001/019993** | 1999 | C07K 14/35, C12N 9/00, A61K 38/00, A61K 39/00 | VIRULENCE GENES OF M. MARINUM AND M. TUBERCULOSIS |
| **WO/2001/014537** | 1999 | A01K 67/033, C07K 14/435, C12N 15/85 | PIGGYBAC TRANSFORMATION SYSTEM |
| **WO/2001/011060** | 1999 | C12N 15/10, C12N 15/62, C12N 15/74 | METHOD OF ISOLATING SECRETION SIGNALS IN LACTIC ACID BACTERIA AND NOVEL SECRETION SIGNALS ISOLATED FROM LACTOCOCCUS LACTIS |
| **WO/2001/011033** | 1999 | C07K 14/285, C12N 15/10 | IDENTIFICATION OF GENES ESSENTIAL FOR THE SURVIVAL OF HAEMOPHILUS INFLUENZAE THROUGH GENOME SCANNING BY TRANSPOSITION MUTAGENESIS |
| **WO/2001/009363** | 1999 | C12N 15/10, C12N 15/90, C12N 9/22 | MUTANT TN5 TRANSPOSASE ENZYMES AND METHOD FOR THEIR USE |
| **WO/2001/007651** | 1999 | C12Q 1/68 | TRANSPOSON MEDIATED DIFFERENTIAL HYBRIDISATION |
| **WO/2001/002555** | 1999 | C12N 15/10, C12N 15/74 | METHOD OF MAKING AND IDENTIFYING ATTENUATED MICROORGANISMS, COMPOSITIONS UTILIZING THE SEQUENCES RESPONSIBLE FOR ATTENUATION, AND PREPARATIONS CONTAINING ATTENUATED MICROORGANISMS |
| **WO/2000/075289** | 1999 | C12N 15/82 | COMPOSITIONS AND METHODS FOR TARGETED GENE INSERTION |
| **WO/2000/073510** | 1999 | C07K 14/435, C12N 9/22 | iETHOD OF TRANSPOSON-MEDIATED MUTAGENESIS IN THE NEMATODE CAENORHABDITIS ELEGANS |
| **WO/2000/071158** | 1999 | A61K 39/21, C07K 14/74, C12N 15/10, C12N 15/63, C12Q 1/68 | TAGGED EPITOPE PROTEIN TRANSPOSABLE ELEMENT |
| **WO/2000/068399** | 1999 | A61K 48/00, C12N 15/63, C12N 15/861, C12N 15/90, C12N 9/22 | VECTOR-MEDIATED DELIVERY OF INTEGRATING TRANSPOSON SEQUENCES |
| **WO/2000/065042** | 1999 | A61K 48/00, C07K 14/435, C12N 15/85, C12N 15/90 | P ELEMENT DERIVED VECTOR AND METHODS FOR ITS USE |
| **WO/2000/056902** | 1999 | C12N 15/80 | POLYNUCLEOTIDES FOR MUTAGENESIS IN FUNGUS COMPRISING A FUNCTIONAL GENE IN MAGNAPORTHE AND AN IMPALA TRANPOSON |
| **WO/2000/055346** | 1999 | C12N 15/10, C12N 15/90, C12N 9/22 | METHODS AND MATERIALS FOR THE RAPID AND HIGH VOLUME PRODUCTION OF A GENE KNOCK-OUT LIBRARY IN AN ORGANISM |
| **WO/2000/051635** | 1999 | A61K 35/74, A61K 39/00, A61K 39/39, C12P 19/04, C12P 7/64 | EMULSAN AND EMULSAN ANALOGS IMMUNIZATION FORMULATIONS AND USE |
| **WO/2000/017343** | 1998 | C12N 15/10, C12N 15/90, C12N 9/22 | METHOD FOR MAKING INSERTIONAL MUTATIONS |
| **WO/2000/012734** | 1998 | C12N 15/82 | TRANSPOSON TAGGING AND GENE DELIVERY IN SMALL GRAIN CEREALS |
| **WO/2000/010582** | 1998 | A61K 35/74, A61K 45/06 | PROBIOTIC, LACTIC ACID-PRODUCING BACTERIA AND USES THEREOF |
| **WO/1999/061604** | 1998 | C07K 14/435, C12N 15/10, C12N 15/85, C12Q 1/68 | A VECTOR FOR GENE TRAP, AND A METHOD FOR GENE TRAPPING BY USING THE VECTOR |
| **WO/1999/050402** | 1998 | C12N 15/10, C12Q 1/68 | SYSTEMATIC IDENTIFICATION OF ESSENTIAL GENES BY $i(IN VITRO) TRANSPOSON MUTAGENESIS |
| **WO/1999/025817** | 1997 | C12N 15/10, C12N 15/90 | TC1-BASED TRANSPOSON VECTORS |
| **WO/1999/016868** | 1997 | C12N 15/74 | TM4 CONDITIONAL SHUTTLE PHASMIDS AND USES THEREOF |
| **WO/1999/009817** | 1997 | A01K 67/027, C12N 15/87, C12N 15/90, A61K 48/00 | USE OF $i(MARINER) TRANSPOSAN IN THE PRODUCTION OF TRANSGENIC ANIMALS |
| **WO/1999/007871** | 1997 | C07K 14/435, C12N 15/90, C12N 9/22, A61K 48/00 | VECTORS AND METHODS FOR PROVIDING CELLS WITH ADDITIONAL NUCLEIC ACID MATERIAL INTEGRATED IN THE GENOME OF SAID CELLS |
| **WO/1999/005295** | 1997 | C12N 15/90 | COMPOSITION AND METHOD FOR TARGETED INTEGRATION INTO CELLS |
| **WO/1999/005281** | 1997 | C07K 14/415, C12N 15/82 | NOVEL NUCLEIC ACID MOLECULES AND USES THEREFOR |
| **WO/1999/004035** | 1997 | C12Q 1/68 | $i(IN VITRO) METHOD FOR PROVIDING TEMPLATES FOR DNA SEQUENCING |
| **WO/1998/056903** | 1997 | A01K 67/027, C12N 15/85, C12N 15/90 | METHODS AND USES FOR TRANSPOSON-BASED GENE TARGETING |
| **WO/1998/044141** | 1997 | C07K 14/575, C07K 14/79, C12N 9/64, C12N 15/69, C12N 15/85 | INSECT EXPRESSION VECTORS |
| **WO/1998/040510** | 1997 | C12N 15/10, C12N 15/90 | DNA-BASED TRANSPOSON SYSTEM FOR THE INTRODUCTION OF NUCLEIC ACID INTO DNA OF A CELL |
| **WO/1998/037205** | 1997 | C12N 9/14, C12N 15/70, C12N 15/90 | MUTATIONS IN ATP-DEPENDENT TRANSPOSITION PROTEINS THAT REDUCE TARGET-SITE SPECIFICITY |
| **WO/1998/028431** | 1996 | C12N 15/82 | TRANSCRIPTIONAL REGULATION IN PLANTS |
| **WO/1998/010077** | 1996 | C12N 9/22, C12N 15/85, C12N 15/90 | SYSTEM FOR $i(IN VITRO) TRANSPOSITION USING MODIFIED TN5 TRANSPOSASE |
| **WO/1998/008960** | 1996 | C12N 9/22, C12N 15/81 | IDENTIFICATION OF AND CLONING A MOBILE TRANSPOSON FROM $i(ASPERGILLUS) |
| **WO/1997/029768** | 1996 | A61K 39/00, A61K 39/112, C07K 14/255 | SALMONELLA TYPHIMURIUM VACCINE |
| **WO/1997/029202** | 1996 | C12N 15/90 | VECTORS AND METHODS FOR PROVIDING CELLS WITH ADDITIONAL NUCLEIC ACID MATERIAL INTEGRATED IN THE GENOME OF SAID CELLS |
| **WO/1997/015679** | 1995 | C07K 14/16, C12N 15/00, C12N 15/861, C12N 15/867, C12N 15/90 | RECOMBINANT VIRUSES CONTAINING MOBILE GENETIC ELEMENTS AND METHODS OF USE IN GENE THERAPY |
| **WO/1996/041891** | 1995 | C07K 14/205, C12Q 1/68 | PROCESS FOR IDENTIFYING SECRETORY GENES FROM HELICOBACTER PYLORI |
| **WO/1996/039803** | 1995 | A01H 1/06, C07K 14/415, C12N 15/01 | USE OF THE INDETERMINATE GAMETOPHYTE GENE FOR MAIZE IMPROVEMENT |
| **WO/1996/029414** | 1995 | C12N 9/22, C12N 15/81 | IDENTIFICATION AND CLONING OF A MOBILE TRANSPOSON FROM ASPERGILLUS |
| **WO/1996/023073** | 1995 | C12N 15/75, C12N 15/90 | DNA INTEGRATION BY TRANSPOSITION |
| **WO/1995/032296** | 1994 | C12N 9/02, C12N 9/88, C12N 15/52, C12N 15/74 | SHUTTLE VECTORS FOR THE INTRODUCTION OF DNA INTO MYCOBACTERIA AND UTILIZATION OF SUCH BACTERIA AS VACCINES |
| **WO/1995/030005** | 1994 | C07K 14/415, C12N 15/82 | GENES REGULATING THE RESPONSE OF $i(ZEA MAYS) TO WATER DEFICIT |
| **WO/1995/023875** | 1994 | C12N 15/90, C12Q 1/68 | $i(IN VITRO) TRANSPOSITION OF ARTIFICIAL TRANSPOSONS |
| **WO/1995/020040** | 1994 | A01N 63/00 | PSEUDOMONAS BIOCONTROL STRAINS |
| **WO/1995/009923** | 1993 | C12N 15/70, C12N 15/866 | METHOD OF PRODUCING RECOMBINANT EUKARYOTIC VIRUSES IN BACTERIA |
| **WO/1995/002058** | 1993 | A01N 63/00, C07K 14/325, C12N 9/00, C12N 15/75 | $i(BACILLUS THURINGIENSIS) TRANSPOSON Tn5401 AND ITS USE IN A SITE-SPECIFIC RECOMBINATION SYSTEM FOR $i(BACILLUS THURINGIENSIS) STRAIN DEVELOPMENT |
| **WO/1995/001095** | 1993 | A61K 38/00, A61K 48/00, C07K 14/435, C07K 14/47, C12N 15/85, C12N 15/90 | TRANSFORMED EUKARYOTIC CELLS, AND TRANSPOSON-BASED TRANSFORMATION VECTORS |
| **WO/1994/023561** | 1993 | A01H 5/02, C07K 14/415, C12N 15/82 | PH GENES AND THEIR USES |
| **WO/1994/011024** | 1992 | A61K 39/102, C07K 14/285 | COMPOSITION PROTECTIVE AGAINST $i(P. MULTOCIDA) PASTEURELLOSIS INFECTION |
| **WO/1994/002599** | 1992 | A61K 48/00, C12N 15/00, C12N 15/10, C12N 15/85, C12N 15/90, C12Q 1/68 | ADVANCED GLYCOSYLATION ENDPRODUCTS TO CAPTURE TRANSPOSONS MODIFIED DNA |
| **WO/1993/016728** | 1992 | A61K 39/00, A61K 39/10 | IMPROVED VACCIN AGAINST BRUCELLA ABORTUS |
| **WO/1993/014211** | 1992 | C07K 14/415, C12N 15/82 | REGULATION OF PLANT GENES |
| **WO/1993/007161** | 1991 | C07K 14/435, C07K 14/705 | MOLECULAR CLONING AND TRANSFORMATION OF CYCLODIENE RESISTANCE |
| **WO/1993/006221** | 1991 | C12N 15/10, C12N 15/63, C12N 15/82 | METHOD FOR PROVIDING A DELETION OR INVERSION MUTATION IN A PLANT GENOME; RECOMBINANT DNA USABLE THEREFOR; MUTATED PLANT |
| **WO/1992/022326** | 1991 | A61K 39/00, C07K 14/35, C12N 15/74 | INSERTIONAL MUTATIONS IN MYCOBACTERIA |
| **WO/1992/019750** | 1991 | A61K 38/00, A61K 39/10, C07K 14/235, C12N 15/63, C12N 15/74, C12N 15/90 | HYBRID TRANSPOSON WITH A PT-OPERON, PLASMIDS AND BACTERIAL STRAINS THEREFOR |
| **WO/1992/019738** | 1991 | C02F 3/12, C02F 3/34, C12N 9/02, C12N 15/52 | MICROBIAL DEGRADATION OF TRICHLOROETHYLENE, DICHLOROETHYLENES AND AROMATIC POLLUTANTS |
| **WO/1992/015687** | 1991 | C07K 14/195, C12N 9/02, C12N 15/62, C12Q 1/02, C12Q 1/68, G01N 33/00, G01N 33/58, G01N 33/84 | FUSED GENES AND THEIR USE FOR DETERMINING THE PRESENCE OF METALS OR OF XENOBIOTIC COMPOUNDS |
| **WO/1992/006205** | 1990 | C12N 15/52, C12N 15/82 | A PROCESS FOR THE GENE MANIPULATION OF PLANT CELLS, RECOMBINANT PLASMIDS, RECOMBINANT BACTERIA, PLANTS |
| **WO/1992/001370** | 1990 | C12N 15/64, C12N 15/82, C12Q 1/68 | BIOLOGICALLY SAFE PLANT TRANSFORMATION SYSTEM |
| **WO/1990/012891** | 1989 | C12N 15/10, C12Q 1/68 | METHOD OF PHYSICALLY MAPPING GENETIC MATERIAL |
| **WO/1990/004041** | 1988 | C07K 14/21, C12N 9/24, C12N 15/00, C12Q 1/02, C12Q 1/04, C12Q 1/70 | BACTERIAL DETECTION BY PHAGE TRANSDUCTION OF DETECTABLE PHENOTYPE |
| **WO/1989/009063** | 1988 | A61K 39/112, C12N 15/00, C12N 15/74 | NOVEL NON-REVERTING SHIGELLA LIVE VACCINES |
| **WO/1989/003427** | 1987 | A61K 39/04, C07K 14/315, C07K 14/35, C12N 9/02, C12N 15/00, C12N 15/68 | A METHOD OF MAINTAINING A DESIRED RECOMBINANT GENE IN A GENETIC POPULATION OF CELLS |
| **WO/1988/003169** | 1986 | C12N 15/62, C12N 15/81, C12N 15/90 | GENE AMPLIFICATION USING RETROTRANSPOSONS |
| **WO/1988/001646** | 1986 | C12N 15/10, C12N 15/76, C12N 15/81 | UNIVERSAL SYSTEM FOR TRANSPOSON MUTAGENESIS |
